# Supplementary material for: Impact of sterol tilt on membrane bending rigidity in cholesterol and 7DHC-containing DMPC membranes
Source: Royal Society of Chemistry journal article supplement (doi:10.1039/c1sm05937h), 2011-01-01
Supplement: c1sm05937h.pdf [file c1sm05937h.pdf]

## SUPPLEMENTARY TABLES:

**Table S1:** Comparison of average sterol tilts and bilayer bending rigidities for 30% DMPC/sterol mixtures calculated from SIM1 and SIM2 trajectories.

|                        | 30% DMPC/Chol<br>(SIM1) | 30% DMPC/7DHC<br>(SIM1) | 30% DMPC/Chol<br>(SIM2) | 30% DMPC/7DHC<br>(SIM2) |
|------------------------|-------------------------|-------------------------|-------------------------|-------------------------|
| Average sterol tilt, ° | 13.6                    | 15.7                    | 16.5                    | 18.8                    |
| $K_c, k_B T$           | 776                     | 420                     | 28                      | 19                      |

**Table S2:** Determined form factors,  $F_h$ , and  $d$ -spacings of DMPC with mol% 7DHC at 35 °C.

| mol% | $d$ (Å) | $F_1$ | $F_2$ | $F_3$ | $F_4$ | $F_5$ |
|------|---------|-------|-------|-------|-------|-------|
| 0    | 61.0    | -1.00 | -1.24 | +0.07 | +0.10 | -     |
| 1    | 61.4    | -1.00 | -1.23 | +0.12 | +0.14 | -     |
| 2    | 61.9    | -1.00 | -1.23 | >0.00 | +0.17 | -     |
| 5    | 61.9    | -1.00 | -1.23 | +0.15 | +0.15 | -     |
| 7    | 62.4    | -1.00 | -1.21 | +0.11 | +0.11 | -     |
| 10   | 63.9    | -1.00 | -1.22 | +0.10 | +0.00 | -     |
| 20   | 63.8    | -1.00 | -1.13 | +0.16 | -0.10 | -0.22 |
| 30   | 63.2    | -1.00 | -1.19 | +0.13 | -0.20 | -0.28 |
| 40   | 62.9    | -1.00 | -1.15 | +0.17 | -0.36 | -0.45 |

**Table S3:** Determined form factors,  $F_h$ , and  $d$ -spacings of DMPC with mol% cholesterol at 35°C.

| mol% | $d$ (Å) | $F_1$ | $F_2$ | $F_3$ | $F_4$ | $F_5$ |
|------|---------|-------|-------|-------|-------|-------|
| 0    | 61.0    | -1.00 | -1.24 | +0.07 | +0.10 | -     |
| 20   | 63.6    | -1.00 | -1.05 | +0.23 | -0.16 | -0.28 |
| 40   | 63.2    | -1.00 | -1.07 | +0.21 | -0.25 | -0.29 |

## SUPPLEMENTARY FIGURE CAPTIONS:

**Figure S1:** Potential energy landscape of the torsion angle C=C-C=C in cis,cis-2,4-hexadiene molecule obtained from *ab initio* calculations (*black line*) and molecular dynamics (*red line*) simulations.

**Figure S2:** Free energy perturbation (FEP) calculations performed in 30% DMPC/Cholesterol system from SIM1 simulations. From the last frame of 30% DMPC/Cholesterol trajectory, four sterols at low tilt angles (*Chols 9, 19, 90, 38*) and four – at high tilt angles (*Chols 110, 54, 37, 5*) were selected for mutations. Subsequently, using FEP, eight separate Chol → 7DHC *in silico* mutations were performed. For each transformation, the calculations were carried out in the forward (*red*) and backward (*green*) directions, employing 60ps or 120ps time intervals between successive iterations in  $\lambda$  parameter. The panels show the free energies  $\Delta\mu(\lambda)$  accumulated in the iteration interval of  $[0; \lambda]$  (*for forward calculations*) or  $[1; \lambda]$  (*for backward calculations*).

**Figure S3:** Convergence of simulation box size dimensions for DMPC/sterol membranes from SIM1 simulations. Time evolution of  $x$ ,  $y$ , and  $z$  coordinates during the last 20ns intervals of DMPC/Chol (*left*) and DMPC/7DHC (*right*) trajectories are shown. For completeness, the convergence of pure DMPC membrane is also illustrated.

**Figure S4:** Convergence of simulation box size dimensions for large DMPC/sterol membranes from SIM2 simulations. Time evolution of  $x$ ,  $y$ , and  $z$  coordinates during the last 14ns interval of 30% DMPC/Chol (*red*), 30% DMPC/7DHC (*green*), and pure DMPC (*black*) membranes are shown.

**Figure S5:** Comparison of  $P(\theta)$  distributions computed from the MD simulations (*red plots*) and from the analytical expression  $P(\theta) = \sin \theta e^{-(\chi/2k_B T)\theta^2} / \int_{\theta=0}^{\pi/2} \sin \theta e^{-(\chi/2k_B T)\theta^2} d\theta$  (*green plots*). To achieve the latter, for each system the value of the tilt modulus  $\chi$  obtained from the low-angle fits to the  $P(\theta)$  densities from the respective MD simulations was used (see the main text). For illustration, the comparison is only demonstrated for 5% and 20% DMPC/7DHC, and 20% and 30% DMPC/Cholesterol mixtures.

**Figure S6:** Normalized probability densities  $P_{12}(\alpha)$  of finding pairs of sterol molecules at angle  $\alpha$  with respect to each other.  $\alpha$  angle is defined as the angle between the vectors C3-C17 on two sterols. To limit the analysis to near neighbors, for these calculations, only sterol molecules within 1nm distance of each other were considered (see Figure 7 and Discussion in the main text) from 20% DMPC/Cholesterol (*red curve*) and 20% DMPC/7DHC mixtures (*green curve*).

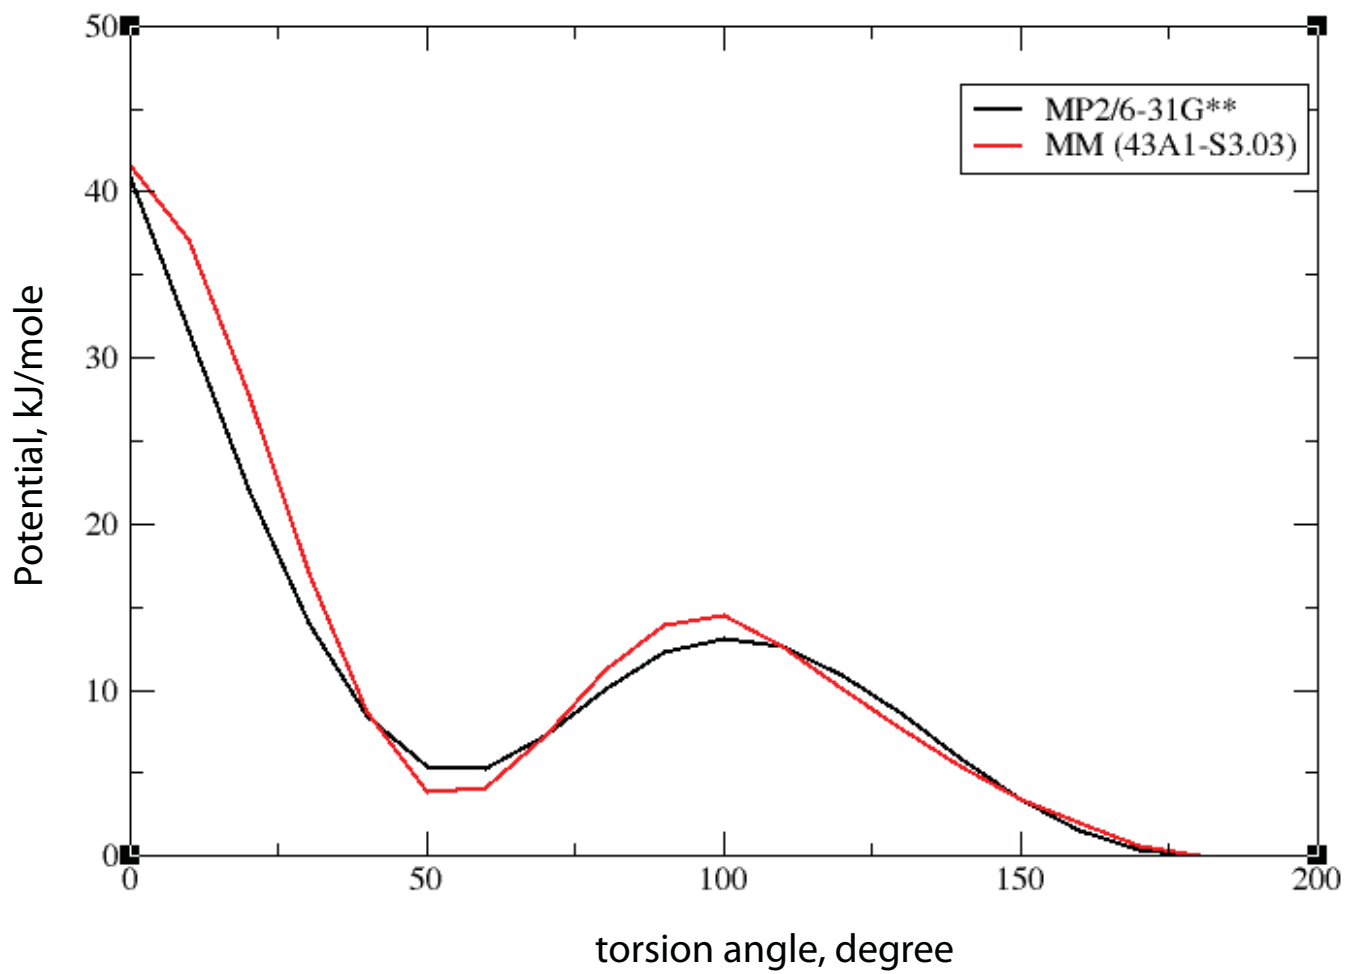

**Figure S1**

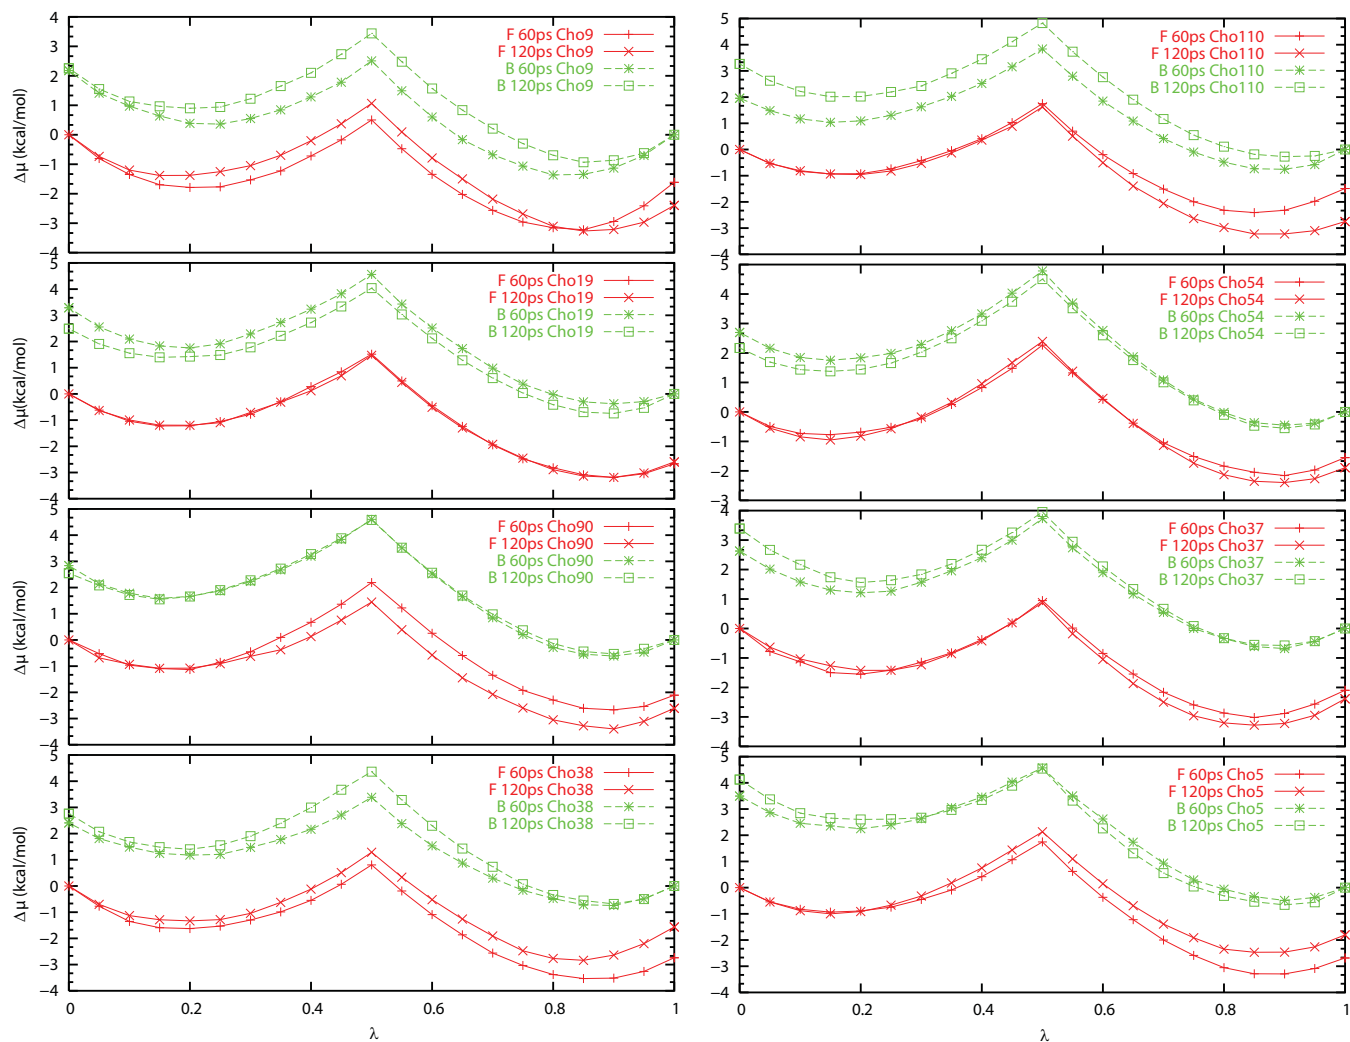

Figure S2

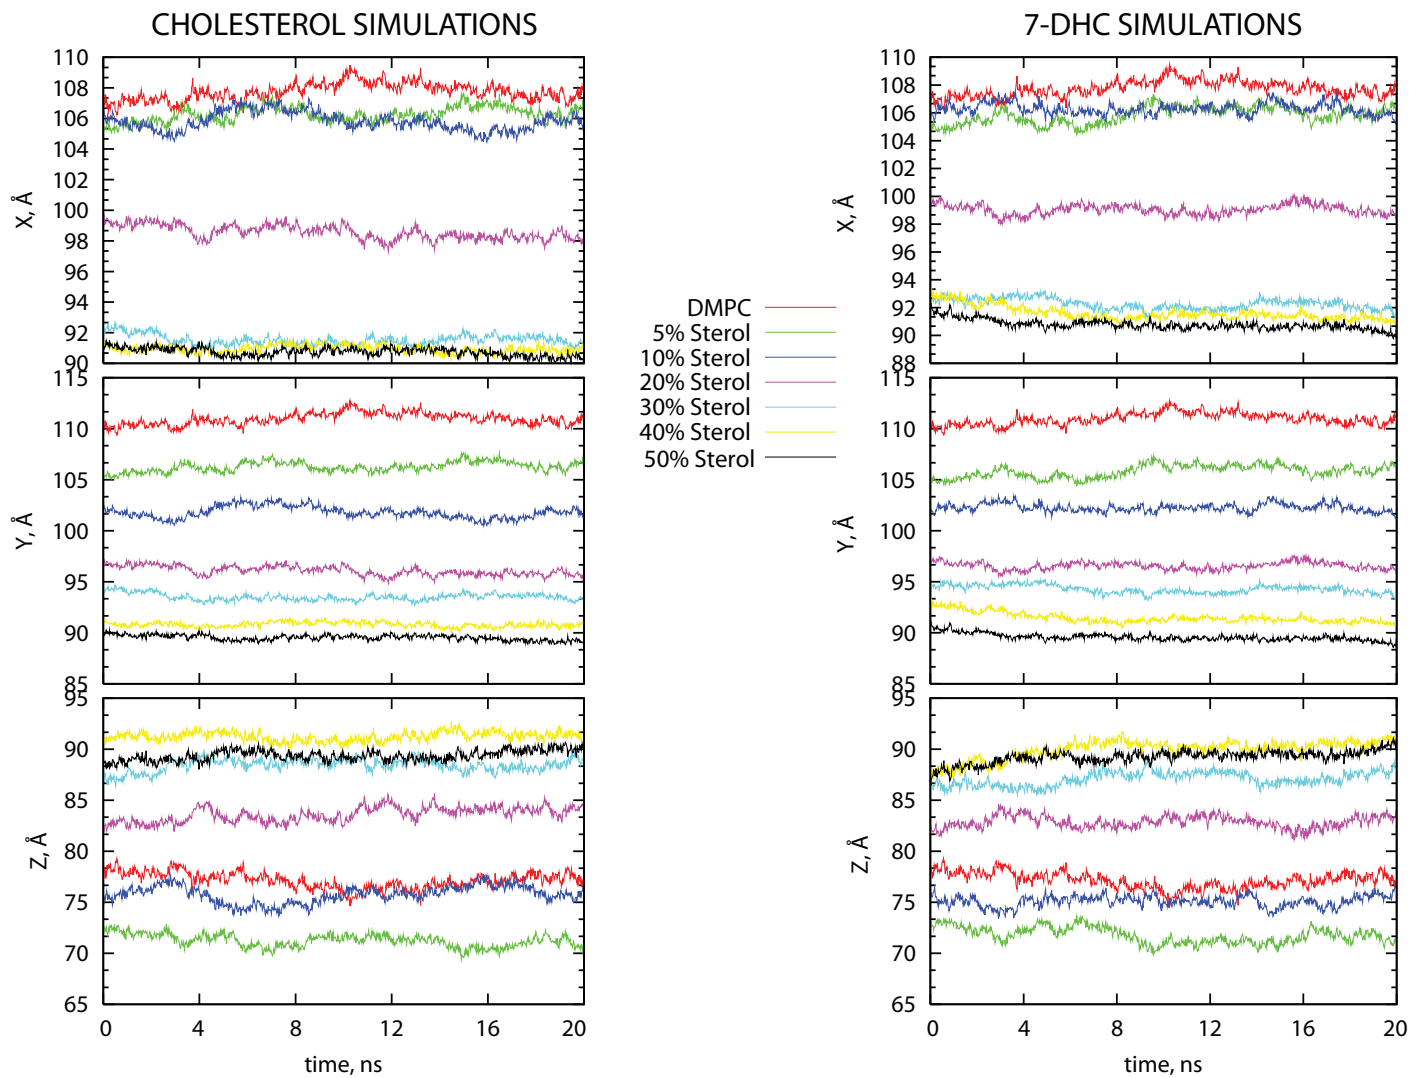

**Figure S3**

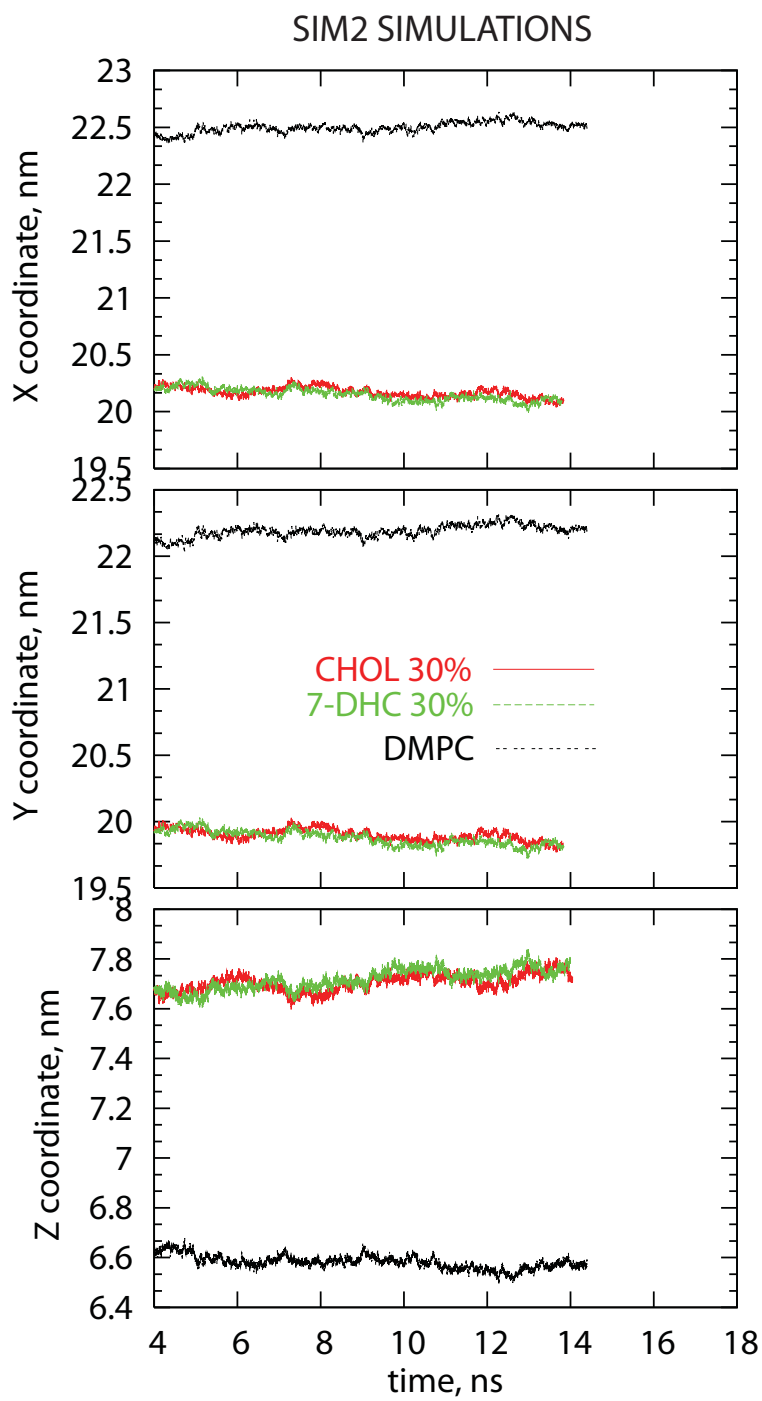

**Figure S4**

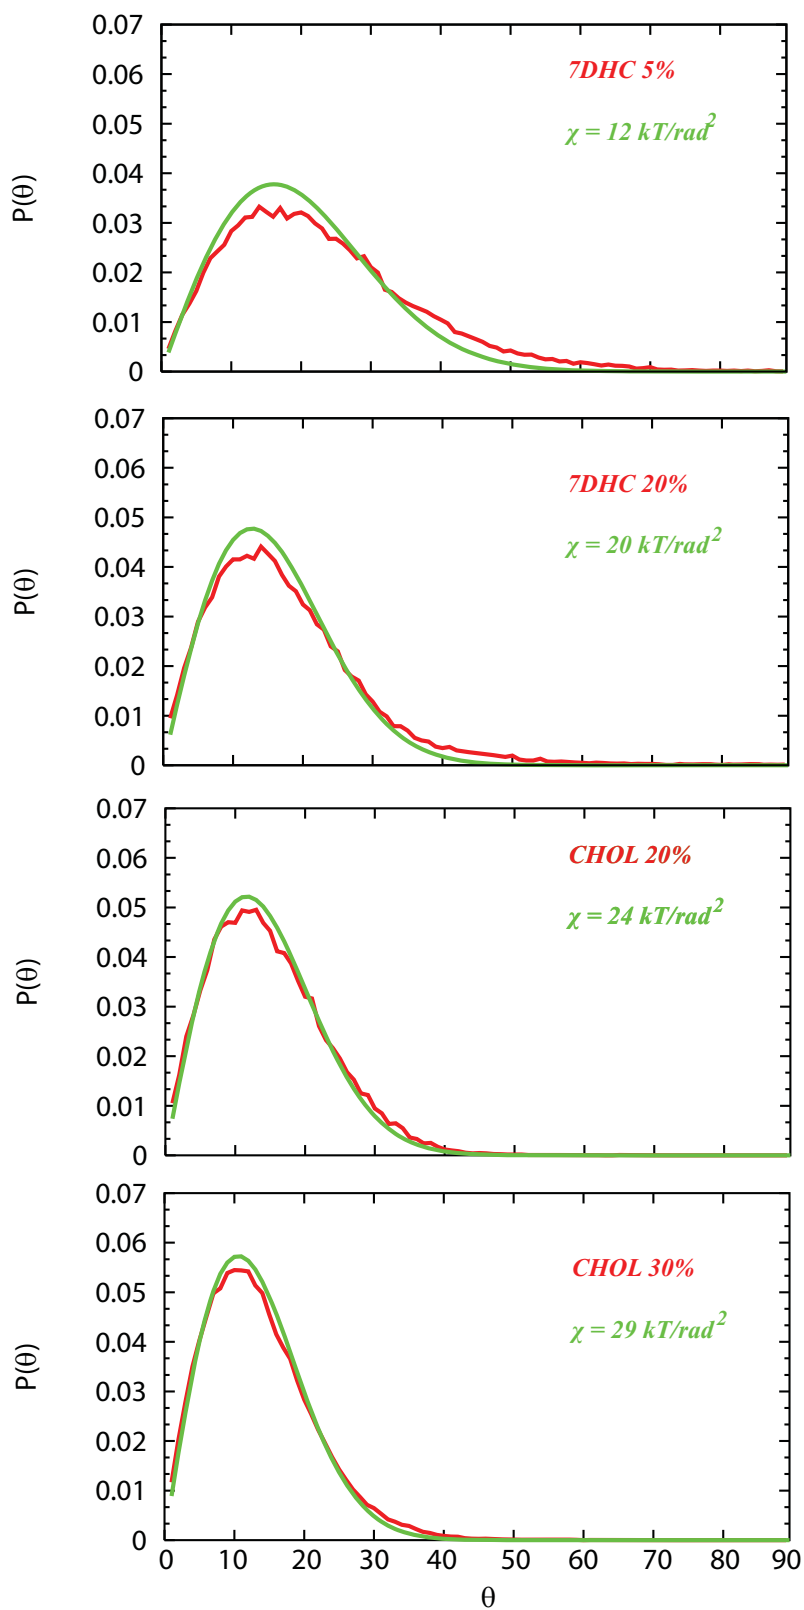

**Figure S5**

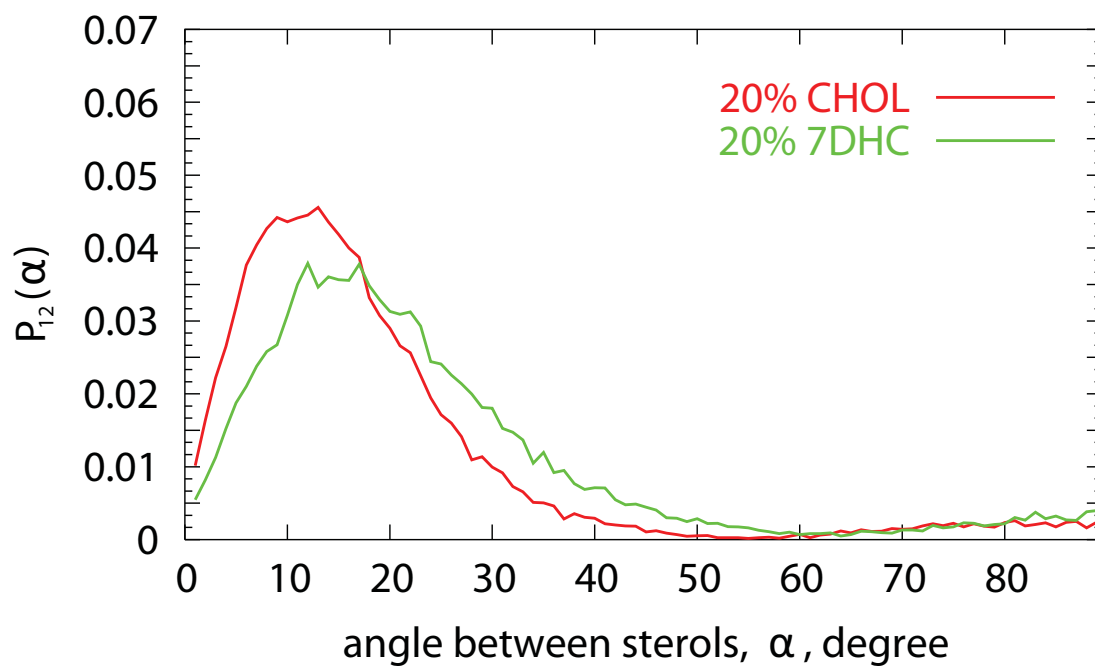

**Figure S6**
